# Supplementary material
Source: publisher figshare collection journal article supplement (https://frontiersin.figshare.com/ndownloader/files/13784063)
Supplement: Supplementary file [file 13784063]

## *Supplementary Material*

### **Esomeprazole increases airway surface liquid pH in primary Cystic Fibrosis epithelial cells**

Livia Delpiano, Joseph J. Thomas, Annabel R. Yates, Sarah J. Rice, Michael A. Gray, Vinciane Saint-Criq<sup>\*</sup>

\* **Correspondence:** Corresponding Author: [vinciane.saint-criq@newcastle.ac.uk](mailto:vinciane.saint-criq@newcastle.ac.uk)

## 1 Supplementary Figures

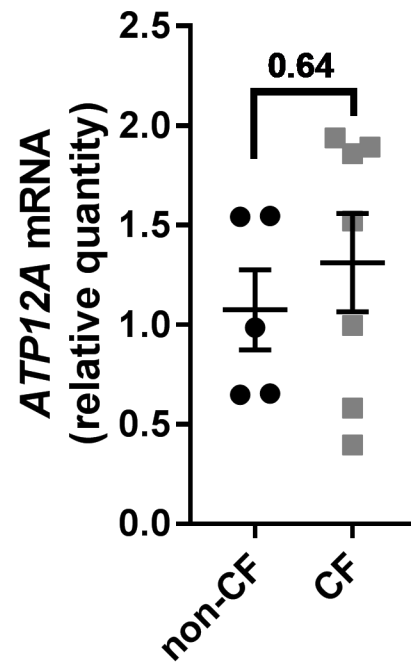

**Supplementary Figure 1: The non-gastric  $H^+/K^+$ -ATPase is expressed at the same level in non-CF and CF primary hAECs.** Relative mRNA quantity of *ATP12A* in non-CF (black circles, n=5, three donors) and CF (grey squares, n=7, three donors) hAECs (Mann-Whitney test).

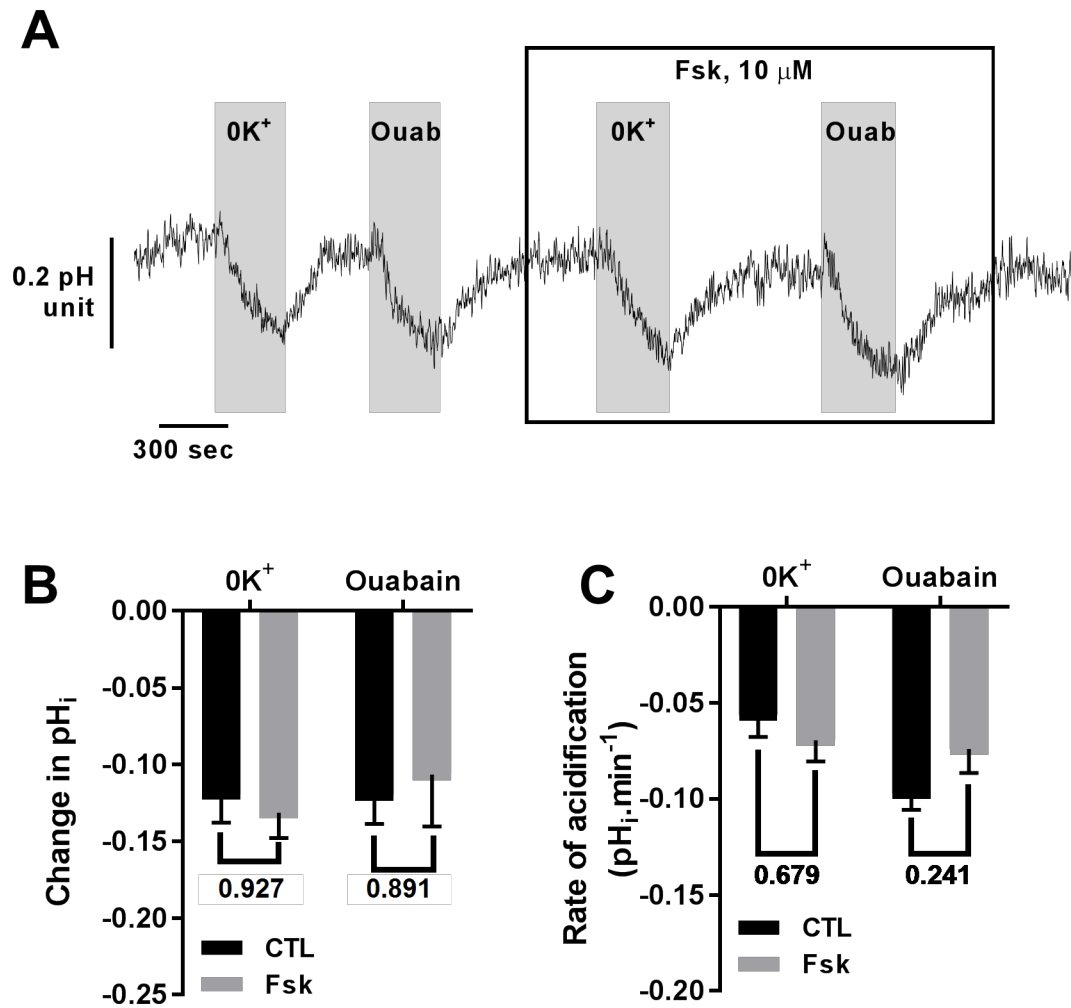

**Supplementary Figure 2: Forskolin does not affect 0K<sup>+</sup> and ouabain-induced acidification.** (A) Representative trace of acute apical effect of 0K<sup>+</sup> and ouabain (Ouab) in the absence or presence of Forskolin (Fsk, 10 μM) on pH<sub>i</sub>. (B) Summary data of the effect of Fsk on 0K<sup>+</sup> and ouabain-induced changes in pH<sub>i</sub> (n≥5, two donors, p>0.05, two-way ANOVA with Sidak's post-test). (C) Summary data of the effect of Fsk on the rate of acidification induced by 0K<sup>+</sup> and ouabain (n≥5, two donors, p>0.05, two-way ANOVA with Sidak's post-test).

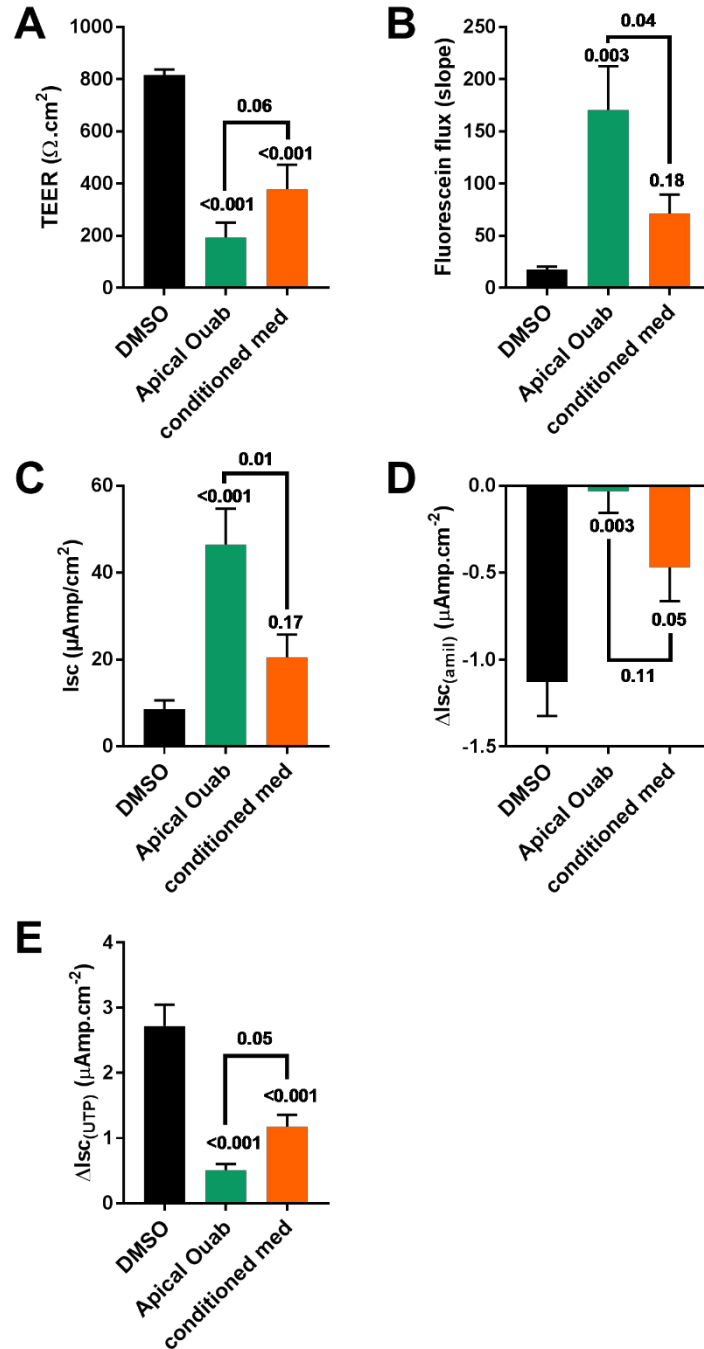

**Supplementary Figure 3: Basolateral treatment of CF hAECs with conditioned medium from cells treated with 70  $\mu\text{M}$  apical ouabain partly reproduced the deleterious effect of apical ouabain treatment.** Effect of apical ouabain (Ouab) and conditioned medium (conditioned med.) on TransEpithelial Electrical Resistance (TEER, A) and Fluorescein Flux (B) assessed in Ussing chambers in the presence of a basolateral to apical  $\text{Cl}^-$  gradient ( $n=6$ , two donors, one-way ANOVA, Holm-Sidak correction). Effect of apical ouabain and conditioned medium on resting short-circuit current (Isc, C,  $n=6$ ), amiloride-sensitive Isc ( $\Delta\text{Isc}_{(\text{amil})}$ , D,  $n=6$ ) and UTP-induced Isc ( $\Delta\text{Isc}_{(\text{UTP})}$ , E,  $n=6$ ).

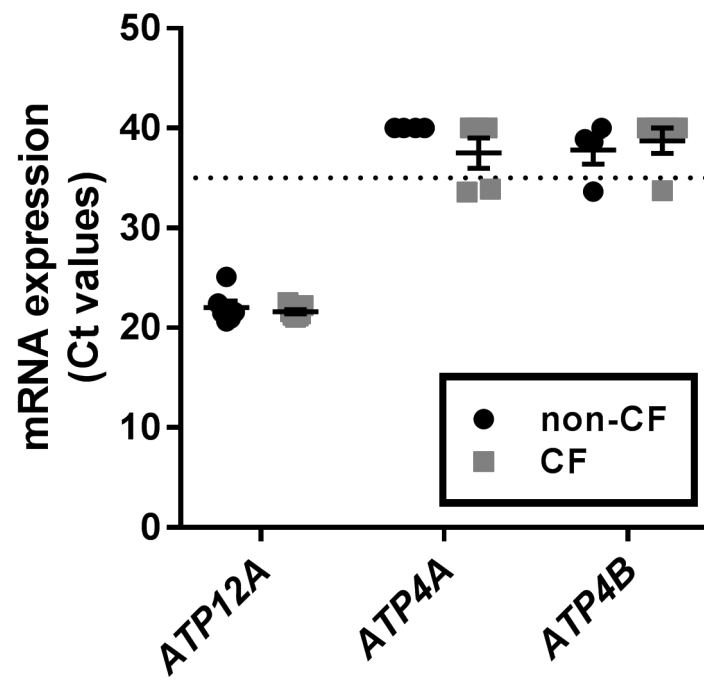

**Supplementary Figure 4: The gastric  $H^+/K^+$ -ATPase is not expressed in non-CF and CF primary hAECs.** Threshold cycle (Ct) values for ATP12A (n=5 non-CF, three donors, n=7 CF, three donors), ATP4A and ATP4B genes (n=4 non-CF, three donors, n=5 CF, three donors).

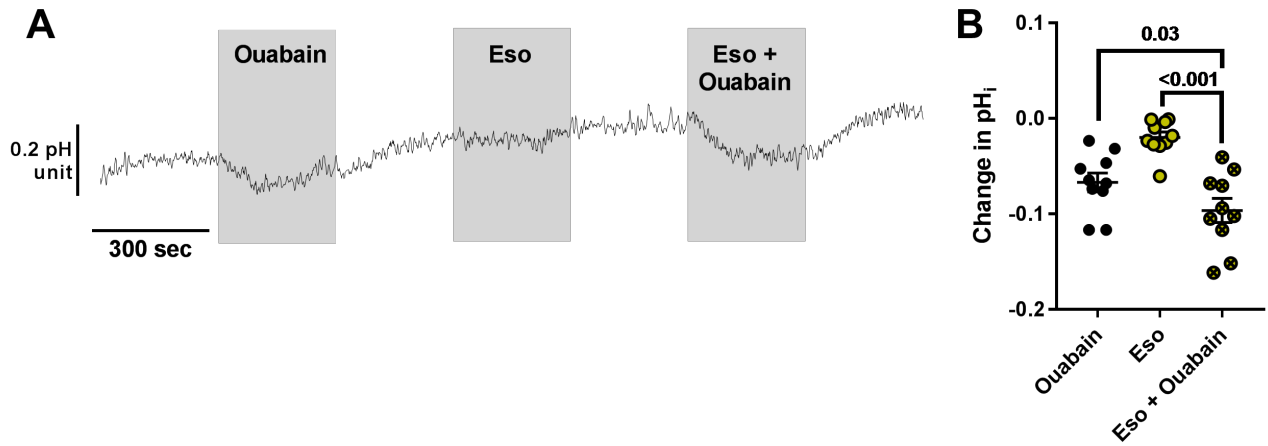

**Supplementary Figure 5: Additive effect of acute esomeprazole and ouabain on  $\text{pH}_i$ .** (A) Representative trace of the effect of acute apical ouabain alone (1 mM), esomeprazole alone (Eso, 100  $\mu\text{M}$ ) or a combination of both on intracellular pH ( $\text{pH}_i$ ). (B) Summary data of the effect of ouabain alone, esomeprazole alone or a combination of both on  $\text{pH}_i$  (n=10, four donors; repeated measures (RM)-one-way ANOVA).

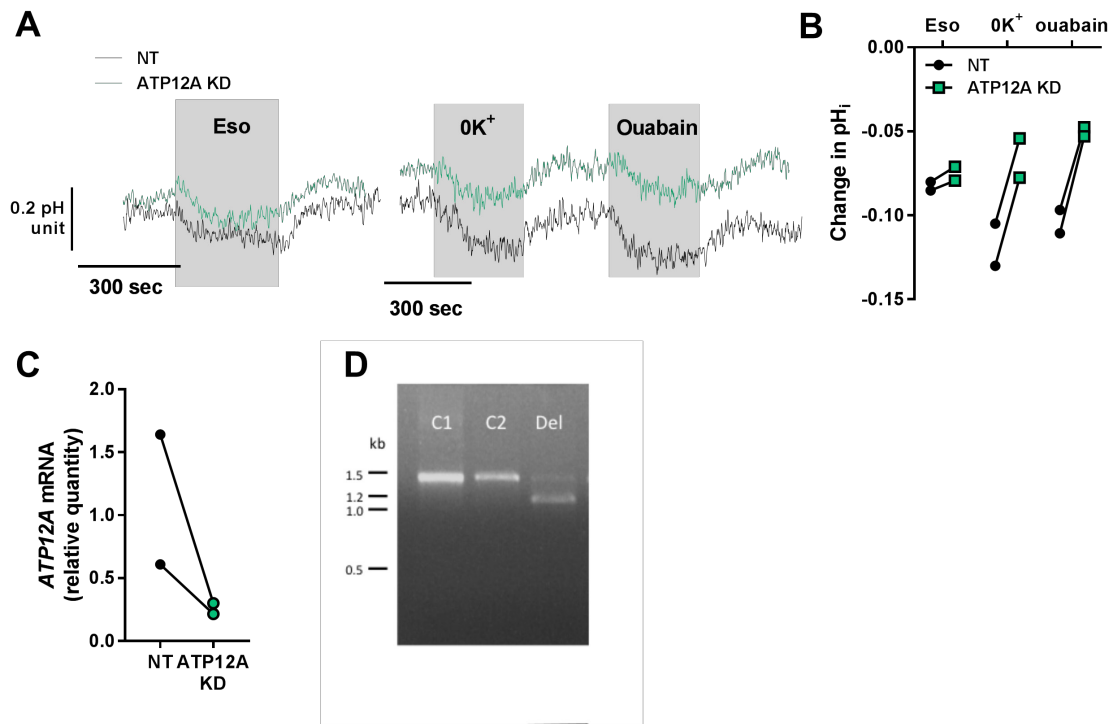

**Supplementary Figure 6: Acute esomeprazole does not target ATP12A.** (A-B) Traces (A) and summary data (B, n = two donors) of pH<sub>i</sub> measurements in response to esomeprazole (Eso, apical, 300μM), K<sup>+</sup>-free solution (0K<sup>+</sup>, apical) or ouabain (apical, 1 mM) in cells knocked-down for *ATP12A*. (C) *ATP12A* mRNA levels in non-transfected CF hAECs (NT) and *ATP12A* CRISPR-Cas9 edited cells (ATP12A KD). (D) Confirmation of the deletion of *ATP12A* exon 2 on agarose gel showing PCR analyses from purified genomic DNA of C1= blood, C2= human chondrocyte cell line Tc28a2 DNA (non-targeting cas9), Del= Tc28a2 expressing gRNAs targeting *ATP12A* exon 2 showing the deletion (390bp).
